# Supplementary material
Source: Copernicus journal article supplement (doi:10.5194/cp-22-1223-2026)
Supplement: Supplementary file 1 [file cp-22-1223-2026-supplement.pdf]

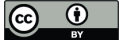

*Supplement of*

## **The Marine Isotopic Stage 7: a relic of the “41 ka world”? Perspectives from a global-scale sea-surface temperature synthesis**

**Etienne Legrain et al.**

*Correspondence to:* Etienne Legrain (etienne.legrain@vub.be)

The copyright of individual parts of the supplement might differ from the article licence.

## Supplementary Information

### S1. Spatio-temporal evolution of individual SST records

#### S1.1 North Pacific basin

5 The MIS 7 SST evolution in the North Pacific ( $>10^{\circ}\text{N}$ ) is reconstructed from 17 records across 10 sites distributed along the basin's eastern (ODP-1012, ODP-1020, LPAZ-21P), central (MD01-2416), and western sectors (all other cores) (Fig. S1). In the eastern sector, MIS 7 is characterized by a two-warm-phase structure clearly preserved in the  $\text{U}^{\text{K}}_{37}$ -SST reconstructions. Notably, the MIS 7c appears warmer than MIS 7e. The northern central Pacific, represented by MD01-2416, shows an intense MIS 7e relative to MIS 7c, although all SSTs remain below PI values. Western Pacific sites (e.g. ODP-1144, ODP-1146, U1429) exhibit more complex variability, with a blurred 10 MIS 7 morphology. A high-frequency variability component appears to be superimposed on the classical two-peak structure of MIS 7. These sites register a warming trend toward younger ages, with MIS 7c exceeding MIS 7e in amplitude. Sites with multiple SST reconstructions (e.g. MD05-2901, ODP-1146) often show notable differences in magnitude and structure, particularly between  $\text{U}^{\text{K}}_{37}$ - and  $\delta^{18}\text{O}_p$ -derived records. At site U1429, for example, inter-proxy trends are consistent, but amplitude discrepancies are substantial: the Mg/Ca-based 15 reconstruction indicates anomalously warm interglacial values exceeding  $+6^{\circ}\text{C}$  above PI, whereas both  $\delta^{18}\text{O}_p$ - and  $\text{U}^{\text{K}}_{37}$ -based estimates remain within  $\pm 2^{\circ}\text{C}$ .

#### S1.2 North Atlantic basin

20 The MIS 7 SST variability in the North Atlantic ( $>0^{\circ}$ ) is reconstructed from 25 records across 15 sites spanning the western (ODP-1059), central (U1313, ODP-607, V30-97), and eastern sectors of the basin (all other cores) (Fig. S1). The SST evolution is marked by a well-defined two-peak structure, typical of MIS 7. In several records (e.g. ODP1059, SU90-39, U1385), a three-peak pattern corresponding to MIS 7e, 7c, and 7a can also be distinguished. In the central Atlantic, the MIS 7c peak is similar to, or warmer than MIS 7e, though both remain below PI values (typically inferior to  $-1^{\circ}\text{C}$ ). In the western Atlantic, the  $\delta^{18}\text{O}_p$  record displays a three-peak morphology, with MIS 7e slightly more pronounced than 7c and 7a, and SSTs reaching PI levels. In the eastern 25 part of the basin, MIS 7e and 7c are generally of comparable magnitude. Iberian margin sites reach PI values, while more northerly sites (e.g. ODP 980) show SSTs exceeding PI by up to  $4^{\circ}\text{C}$ . Sites with multiple proxies reveal substantial mismatches in both amplitude and structure, particularly between MAT- and  $\delta^{18}\text{O}_p$ -derived SSTs. At site U1385, for example, the MAT reconstruction shows a strongly amplified MIS 7e, whereas the  $\delta^{18}\text{O}_p$  record captures similar maxima for both MIS 7e and 7c, making MIS 7c appear relatively warmer than in the MAT 30 record.

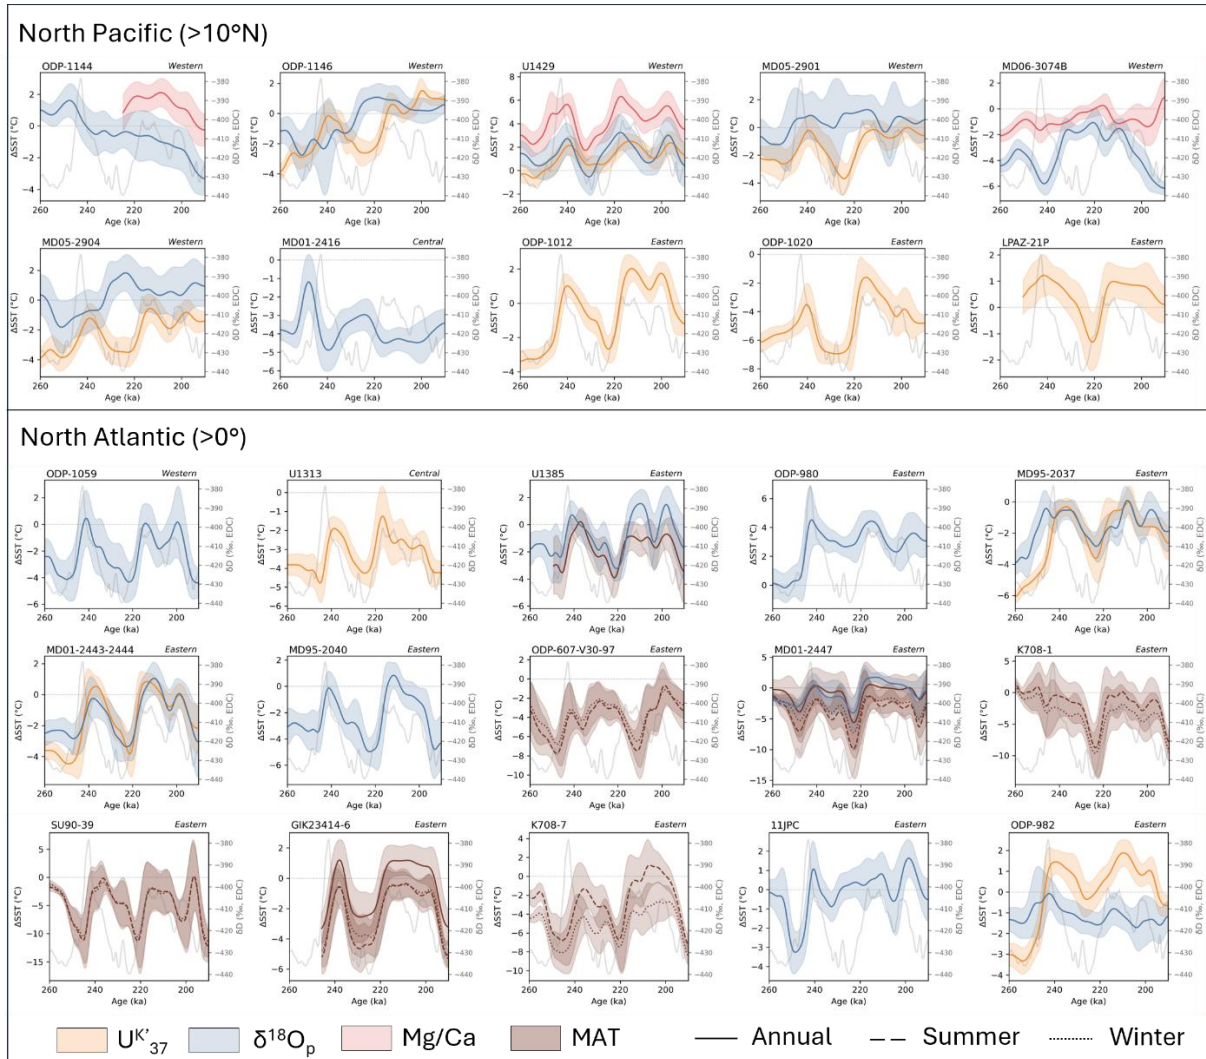

Fig. S1: SST anomalies relative to PI for sites located in the North Pacific (>10°N) and North Atlantic (>0°). Colors refers to the SST proxies used:  $UK'_{37}$  (orange),  $\delta^{18}O_p$  (blue), Mg/Ca (pink) and Modern Analog Technique (MAT) (brown). The grey curve is the  $\delta D$  record from the EPICA Dome C (EDC) ice core (Jouzel et al., 2007) on the AICC2023 timescale (Bouchet et al., 2023), added for visual comparison. The horizontal dotted grey line corresponds to the PI value at the location of each core. SST anomalies are representative of annual (solid lines), summer (dashed lines) or winter (dotted lines) signal. All records are time-binned every 500 years to consider age uncertainties. The colored envelopes represent the  $1\sigma$  uncertainty computed from age and SST uncertainties. The top right mention refers to the sub-region of the oceanic basin, as described in the main text.

### S1.3 Equatorial pacific basin

35 The MIS 7 SST evolution in the Equatorial Pacific (10°N–10°S) is reconstructed from 25 records across 18 sites distributed across the eastern (8 cores), central (ML1208-16BB), and western sectors (7 cores) of the basin, along with two additional sites from the China Sea (ODP-1143 and MD97-2141) (Fig. S2). The overall structure of SST variability is highly heterogeneous, with substantial spatial differences in amplitude and morphology of substages. In the eastern Equatorial Pacific, SST signals are particularly variable. For example, two  $\delta^{18}O_p$ -based SST records located only ~1,500 km apart display opposite trends over the 260–190 ka interval: a gradual cooling in RC13-110 versus a gradual warming in ODP-677. Additionally, some records show a flat MIS 7 signal (e.g. V19-30, with <1°C of variability between 260 and 210 ka), whereas others (e.g. ODP-806) record a TIIIa amplitude exceeding 3°C. Overall, SSTs in this region remain close to or slightly colder than PI throughout the interval. In

50 the central Pacific, the  $\delta^{18}\text{O}_p$ -SST reconstruction from ML1208-16BB displays low variability ( $<2^\circ\text{C}$ ) throughout  
MIS 7. MIS 7c appears in most of records warmer than MIS 7e, but both peaks are  $\sim 3^\circ\text{C}$  below PI values. In the  
western Equatorial Pacific, the classical bi-phase structure of MIS 7 is more clearly expressed. In some records  
(e.g. MD05-2925), both peaks are of similar magnitude, while in others (e.g. ODP-871), MIS 7c appears slightly  
warmer. Sites with multi-proxy reconstructions further reveal structural and amplitude discrepancies. For instance,  
55 at site KX97322-4, the  $\delta^{18}\text{O}_p$ -SST record shows no significant variability, whereas the Mg/Ca-based reconstruction  
exhibits a distinct two-peak pattern with SSTs approaching PI values during MIS 7e and 7c. In the China Sea, both  
records indicate a more pronounced MIS 7c compared to MIS 7e, although their absolute SST anomalies relative  
to PI differ across proxies.

#### S1.4 Indian Ocean basin

60 The MIS 7 SST evolution in the Indian Ocean is reconstructed from 14 records across 10 sites distributed across  
the southern (3 cores), eastern (2 cores), western (1 core), and northern (4 cores) sectors of the basin (Fig. S2).  
The SST signal is characterized by large heterogeneity, which does not appear to follow a clear spatial pattern  
across sub-basins. While all records show a distinct MIS 7e peak, with temperatures ranging approximately  $\sim 2^\circ\text{C}$   
relative to PI, the expression of TIIIa and MIS 7c is more variable. Some cores display a two-peak morphology  
(e.g. MD04-2881, MD98-2152), whereas others do not record any warming during MIS 7c (e.g. RC27-61). In  
65 addition, some records show a more intense MIS 7a compared to 7c (e.g. ODP-722), or exhibit a delayed MIS 7c  
peak centered around 210 ka (e.g. MD04-2881). Interestingly, the only core located within the Agulhas Current  
region (MD96-2077) does not record any distinct TIIIa event. Instead, MIS 7 is expressed as a continuous warm  
plateau. At the three-proxy site RC11-120, major discrepancies are observed between the  $\delta^{18}\text{O}_p$ -derived SST and  
both the MAT- and Mg/Ca-based reconstructions, highlighting substantial proxy-related differences in this region.

#### 70 S1.5 Other seas

The “Other seas” category includes four sites from the Caribbean Sea (ODP-1002, ODP-999, MD02-2575, and  
MD94-480) and one from the Mediterranean (PRGL1) (Fig. S2). In the Caribbean Sea, all four records consistently  
show a well-defined MIS 7e, with SST amplitudes reaching up to  $5^\circ\text{C}$ , except for ODP-1002, which displays an  
exceptional amplitude during TIII ( $\sim 11^\circ\text{C}$ ), the highest value observed across the entire dataset. In contrast, TIIIa  
75 is not recorded at these sites; MIS 7 is instead expressed as a gradual cooling trend from MIS 7a toward MIS 6. In  
the Mediterranean Sea, the  $\delta^{18}\text{O}_p$ -SST record from PRGL1 shows a two-peak morphology, slightly shifted toward  
younger ages compared to the broader dataset ( $\sim 230$  ka and 210 ka). The  $\text{U}^{\text{K}}_{37}$ -SST reconstruction at the same site  
exhibits a flatter pattern, highlighting discrepancies between different SST proxies in this marginal sea.

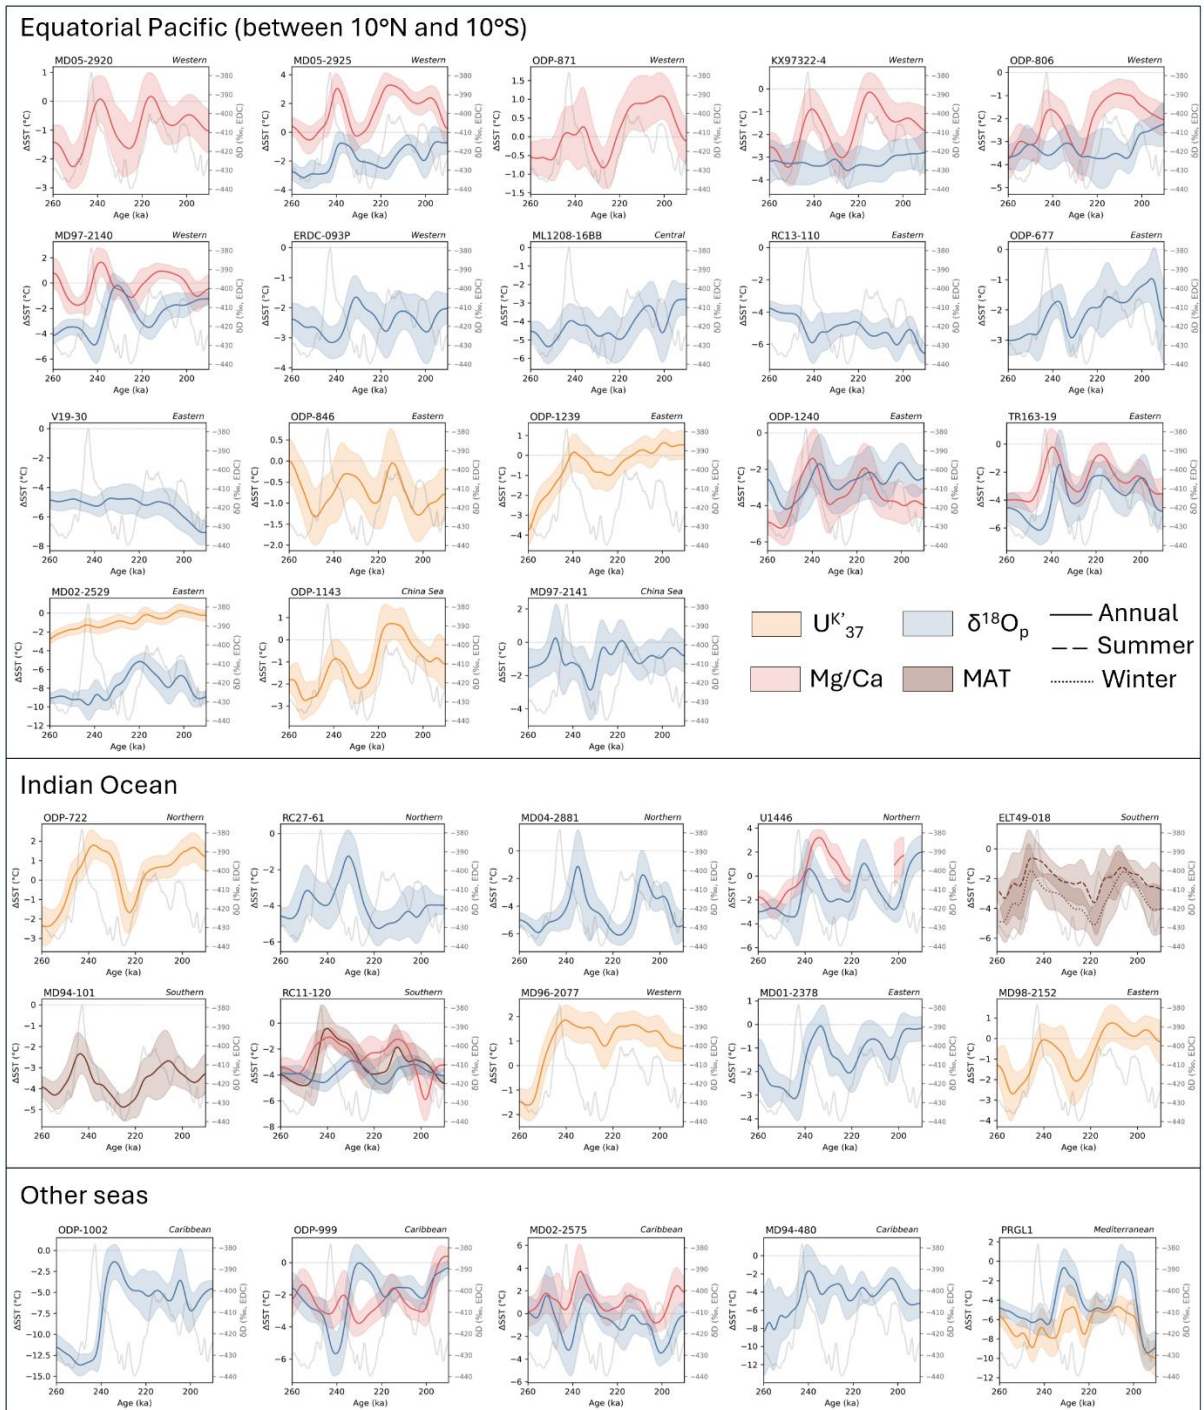

80 Fig. S2: Same as Fig. S1 but for Equatorial Pacific (between 10°N and 10°S), Indian Ocean and other seas.

### S1.6 South Atlantic basin

The MIS 7 SST evolution in the South Atlantic is reconstructed from 28 records across 20 sites, the majority of which (15/20) are located along the central and eastern margin of the basin between 20°S and 53°S (Fig. S3). The remaining five sites are situated in the equatorial zone, between -1°S and -9°S. The equatorial sites display a coherent pattern, with well-defined MIS 7e and 7c peaks, the latter being more amplified. SSTs during MIS 7e and 7c are generally 1–2°C warmer than PI in this area. The amplitude of TIIIa varies notably, ranging from values

85

similar to TIII (e.g. 2°C in GeoB1113-4) to significantly weaker expressions (e.g. 2°C vs. 6°C in ODP-662). Across the broader South Atlantic, no clear latitudinal gradient in SST variability is evident. Instead, two dominant MIS 7 morphologies are observed. The first includes records with a well-defined MIS 7e, more pronounced than MIS 7c. The second group includes records with flatter and noisier SST trends, where MIS 7e and 7c are not clearly distinguishable as the warmest phases of the interval (e.g. TN057-06, RC13-228). This apparent proxy-dependence, illustrated by contrasting results at GeoB1028-5 depending on the SST proxy used, suggests that reconstruction method plays a significant role in shaping interpretations of MIS 7 SST variability in this region.

#### S1.7 South Pacific basin

The South Pacific (>10°S) is represented by nine records from seven distinct sites, distributed across the eastern (GeoB3327-5) and western (all other cores) sectors of the basin (Fig. S3). The only site from the southeastern Pacific (GeoB3327-5) exhibits a clear two-peak structure, with MIS 7c more pronounced (+1°C relative to PI) than MIS 7e (similar to PI), which remains close to PI levels. In the western South Pacific, SST records generally show well-defined TIII and MIS 7e peaks, with the exception of ODP-1125. These peaks are of similar or even greater amplitude than MIS 7c. Compared to other basins, the South Pacific records are relatively consistent in structure, although inter-proxy biases remain apparent. For example, at site SO136-GC3, the morphology of  $\delta^{18}\text{O}_p$ - and  $\text{U}^{\text{K}}_{37}$ -based SST estimates differ substantially.

#### S1.8 Selection of records

We excluded a few records from the stacking process (see Section 3.1 in the main text). Specifically, we removed records that (1) display a pattern of variability markedly different from the regional trend, or (2) show SST estimates that strongly disagree with those derived from another proxy at the same site. This includes 14  $\delta^{18}\text{O}_p$ -based SST records (ODP-1144, MD01-2416, MD05-2904, KX97322-4, ODP-806, MD97-2140, RC13-110, V19-30, MD02-2529, MD97-2141, ODP-999, TN057-06, GeoB1028-5 and SO136-GC3) and one Mg/Ca-based SST record (ODP-1144).

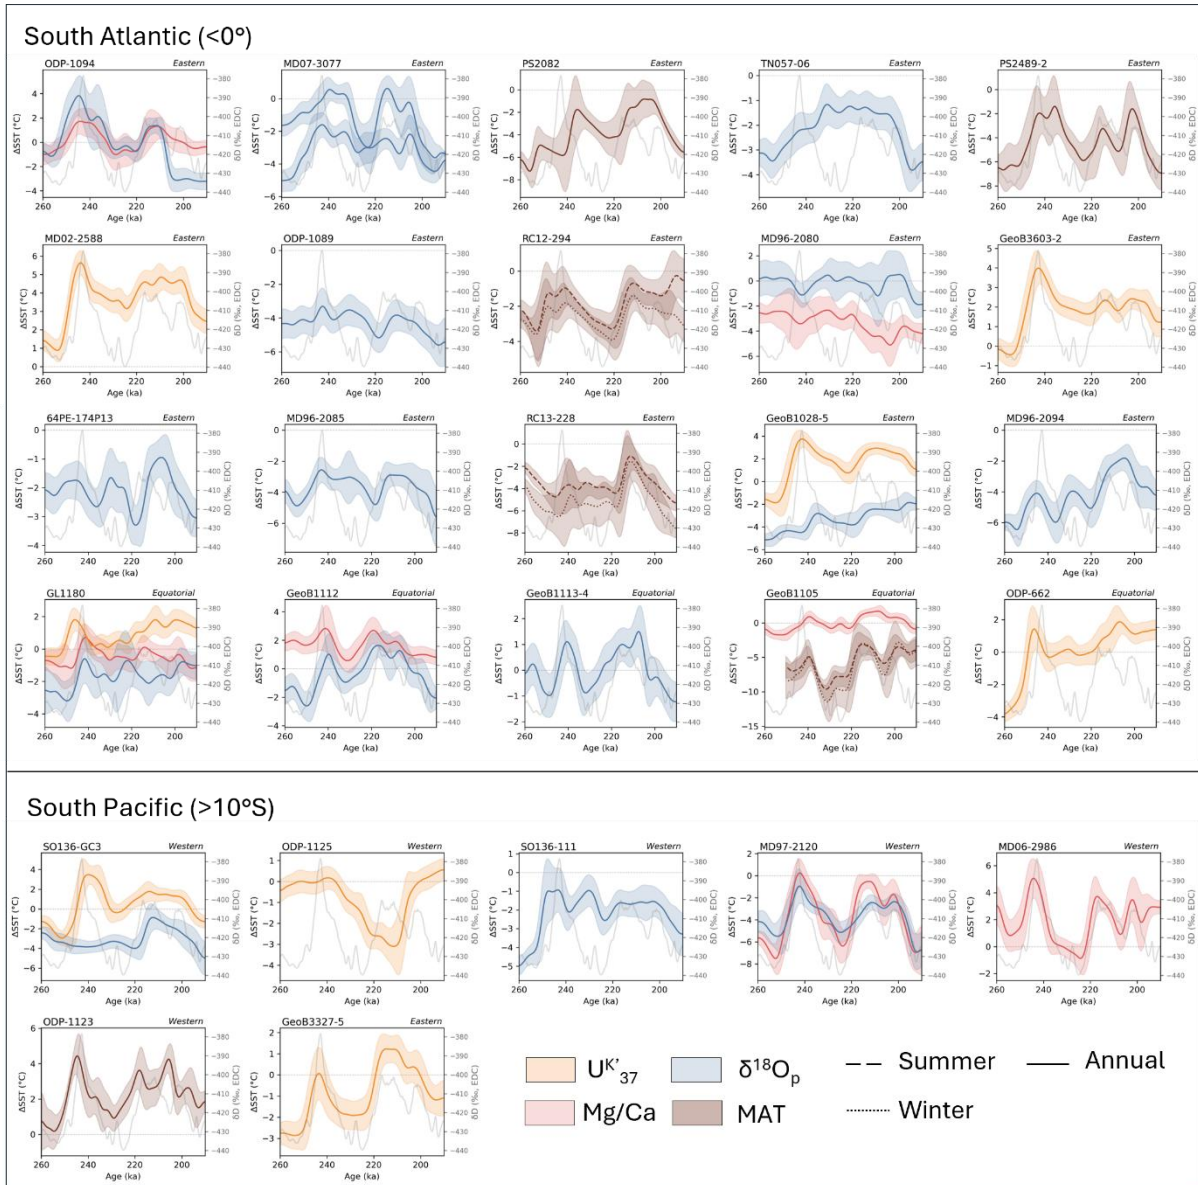

110

Fig. S3: Same as Fig. S1 but for South Atlantic (<0°) and South Pacific (>10°S). The two  $\delta^{18}\text{O}_p$ –SST records of the MD07-3077 core correspond to SST records from two different species of planktonic foraminifera: *Neogloboquadrina pachyderma* (top curve) and *Globigerina bulloides* (bottom curve) (*this study*).

## 115 S2. Chronologies

Chronologies were established by aligning oceanic basins onto ice core and speleothem archives, that differs among the considered basins. In the North Atlantic and Mediterranean basin, the records are aligned to the Greenland Synthetic Curve (Barker et al., 2011). In the North and Equatorial Pacific basin, the alignment procedure differs slightly between sub-basins. The North- and Equatorial-East Pacific records are aligned to the synthetic Greenland temperature record (GLT\_syn). In contrast, the North- and Equatorial-West Pacific records are aligned to a reference record, itself aligned to the Sanbao speleothem record (Cheng et al., 2016). In the South Atlantic, South Pacific and Indian Ocean basins, the records are aligned onto reference records, themselves aligned to the EPICA Dome C ice isotopes records (Jouzel et al., 2007). Finally, the Caribbean records are aligned through a

120

125 stepwise procedure. Core MD02-2575 was first aligned to U1385 using benthic  $\delta^{18}\text{O}$ , as direct alignment of SST signals with North Atlantic SST records was not feasible due to large discrepancies between the records. Subsequently, ODP-999 and ODP-1002 were aligned to MD02-2575 using both Mg/Ca and  $\delta^{18}\text{O}$  SST records.

Fig. S4 presents the alignment of each site (blue curve) to its reference (black curve).

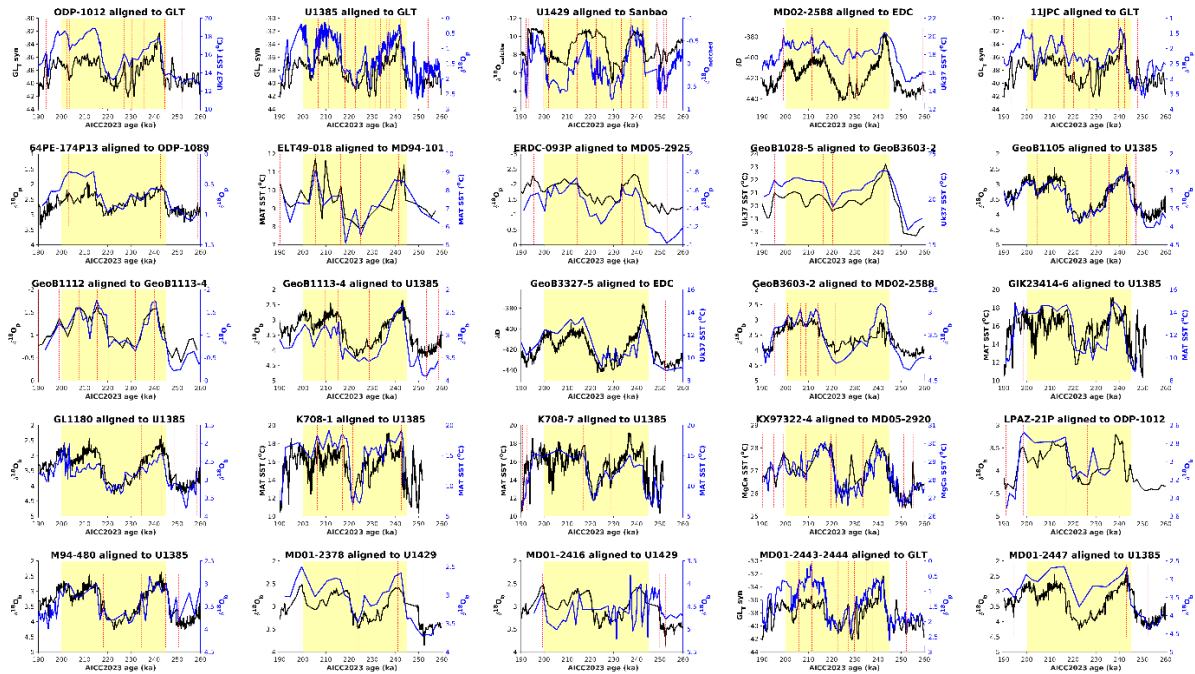

130 Fig. S4: Alignments of the SST sites used in this study. For each plot, the blue line represents the record used to align to the reference (black line). The dotted vertical red lines are the tie-points as defined in the AnalySeries software (Paillard et al., 1996). The light yellow area in each plot approximately identifies the MIS 7.

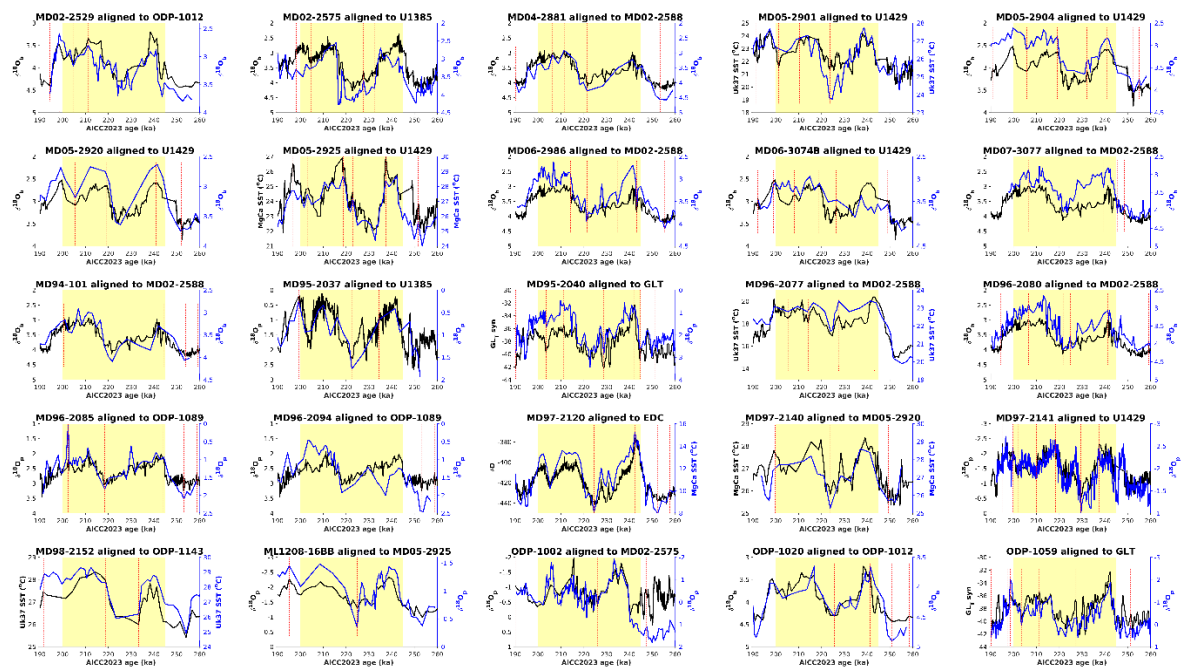

Fig. S4 (continued)

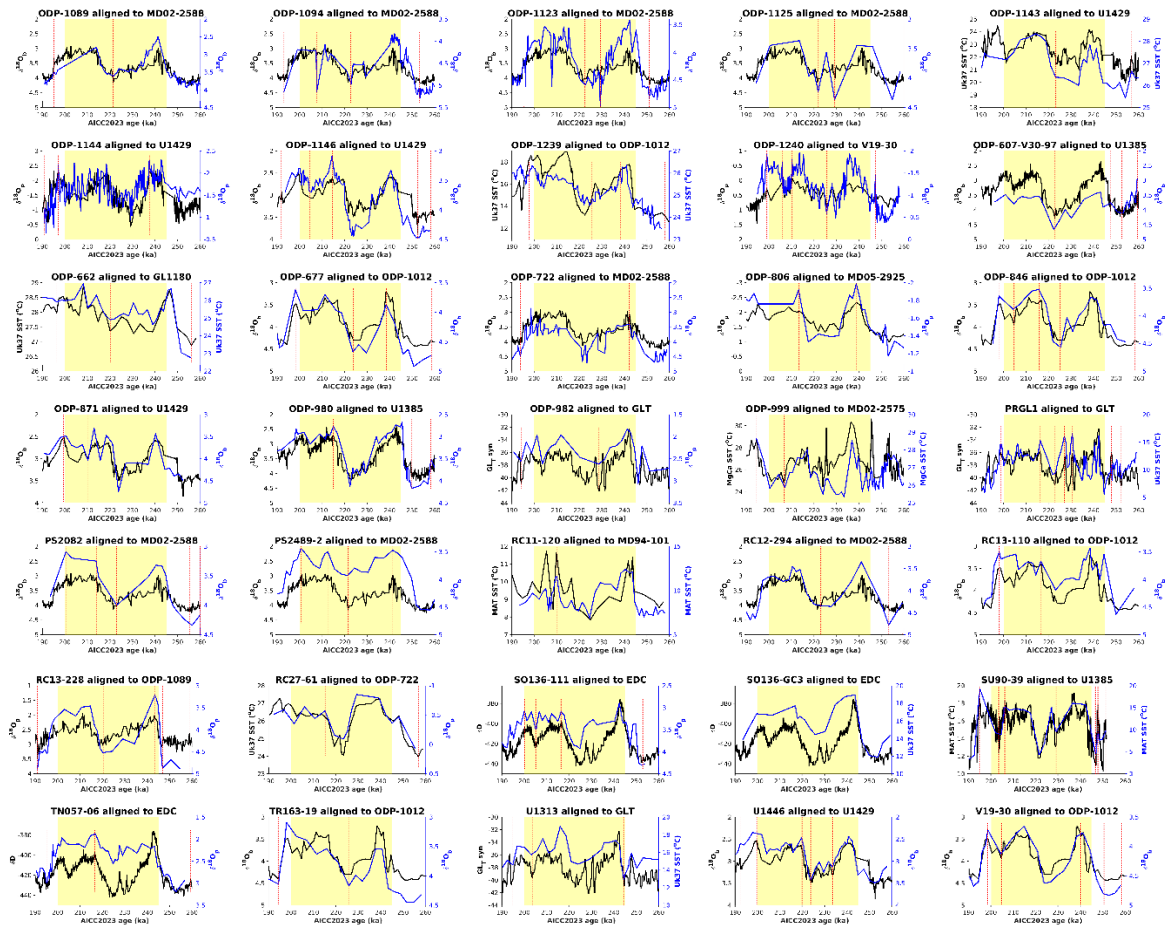

135

Fig. S4 (continued)

137  
138  
139  
140

Table S1: Locations, available proxies used in this study, SST type and original references of the sites used in this study. All UK'<sub>37</sub> records are considered to reflect annual conditions, except for ODP-982. Due to its specific location above 48°N in the North Atlantic, and following the authors' recommendation, this record is interpreted as reflecting seasonal variations (Tierney and Tingley, 2018).

| Core        | Lat (°) | Long (°) | Elevation (m) | Basin               | Method (SST)      | Species              | SST type        | Mean resolution (kyr) | Reference |      |
|-------------|---------|----------|---------------|---------------------|-------------------|----------------------|-----------------|-----------------------|-----------|------|
| 11JPC       | 56.23   | -27.65   | -2707         | North Atlantic      | δ <sup>18</sup> O | <i>G. bulloides</i>  | Annual          | 0.95                  | [1]       |      |
| 64PE-174P13 | -       | 29.76    | 2.40          | -2912               | South Atlantic    | δ <sup>18</sup> O    | <i>G. ruber</i> | Seasonal              | 2.75      | [2]  |
| ELT49-018   | 46.05   | 90.16    | -3282         | Indian              | MAT               | <i>Na</i>            | Seasonal        | 1.51                  | [3]       |      |
| ERDC-093P   | -2.24   | 157.01   | -1604         | Equatorial Pacific  | δ <sup>18</sup> O | <i>T. sacculifer</i> | Annual          | 1.80                  | [4]       |      |
| GeoB1028-5  | -       | 20.10    | 9.19          | -2209               | South Atlantic    | δ <sup>18</sup> O    | <i>Bulk</i>     | Annual                | 1.70      | [5]  |
| GeoB1028-5  | -       | 20.10    | 9.19          | -2209               | South Atlantic    | UK' <sub>37</sub>    | <i>Na</i>       | Annual                | 2.09      | [6]  |
| GeoB1105    | -1.67   | -12.43   | -3231         | Equatorial Atlantic | MAT               | <i>Na</i>            | Seasonal        | 1.61                  | [7]       |      |
| GeoB1105    | -1.67   | -12.43   | -3225         | Equatorial Atlantic | Mg/Ca             | <i>T. sacculifer</i> | Annual          | 2.19                  | [8]       |      |
| GeoB1112    | -5.77   | -10.75   | -3122         | Atlantic            | δ <sup>18</sup> O | <i>G. ruber</i>      | Annual          | 1.94                  | [5]       |      |
| GeoB1112    | -5.77   | -10.75   | -3122         | Equatorial Atlantic | Mg/Ca             | <i>T. sacculifer</i> | Annual          | 1.94                  | [8]       |      |
| GeoB1113-4  | -5.75   | -11.04   | -2374         | Atlantic            | δ <sup>18</sup> O | <i>G. ruber</i>      | Annual          | 1.63                  | [9]       |      |
| GeoB3327-5  | -       | 43.24    | -79.99        | -3531               | South Pacific     | UK' <sub>37</sub>    | <i>Na</i>       | Annual                | 3.23      | [10] |
| GeoB3603-2  | 35.13   | 17.54    | -2840         | South Atlantic      | UK' <sub>37</sub> | <i>Na</i>            | Annual          | 1.76                  | [11]      |      |
| GIK23414-6  | 53.54   | -20.29   | -2201         | North Atlantic      | MAT               | <i>Na</i>            | Seasonal        | 1.61                  | [12]      |      |
| GL1180      | -8.45   | -33.55   | -1037         | Equatorial Atlantic | δ <sup>18</sup> O | <i>G. ruber</i>      | Annual          | 2.00                  | [13]      |      |
| GL1180      | -8.45   | -33.55   | -1037         | Equatorial Atlantic | Mg/Ca             | <i>G. ruber</i>      | Annual          | 2.00                  | [13]      |      |
| GL1180      | -8.45   | -33.55   | -1037         | Atlantic            | UK' <sub>37</sub> | <i>Na</i>            | Annual          | 2.00                  | [14]      |      |

|                |       |        |        |                    |                            |                              |          |      |      |
|----------------|-------|--------|--------|--------------------|----------------------------|------------------------------|----------|------|------|
| K708-1         | 50.00 | -23.73 | -4053  | North Atlantic     | MAT                        | Na                           | Seasonal | 1.00 | [15] |
| K708-7         | 53.93 | -24.08 | -3502  | North Atlantic     | MAT                        | Na                           | Seasonal | 2.00 | [16] |
| KX97322-4      | -0.03 | 159.25 | -2362  | Equatorial Pacific | $\delta^{18}\text{O}$      | <i>G. ruber</i>              | Annual   | 0.54 | [17] |
| KX97322-4      | -0.03 | 159.25 | -2362  | Equatorial Pacific | Mg/Ca                      | <i>G. ruber</i>              | Annual   | 2.84 | [17] |
| LPAZ-21P       | 22.98 | 109.47 | -624   | North Pacific      | $\text{U}^{\text{K}}_{37}$ | Na                           | Annual   | 1.63 | [18] |
| M94-480        | 23.80 | -87.01 | -730.3 | Other              | $\delta^{18}\text{O}$      | <i>G. ruber</i>              | Annual   | 1.29 | [19] |
| MD01-2378      | 13.08 | 121.79 | -1783  | Indian             | $\delta^{18}\text{O}$      | <i>G. ruber</i><br><i>N.</i> | Annual   | 2.32 | [20] |
| MD01-2416      | 51.27 | 167.73 | -2317  | North Pacific      | $\delta^{18}\text{O}$      | <i>pachyderma</i>            | Annual   | 2.00 | [21] |
| MD01-2443-2444 | 37.69 | -10.15 | -2790  | North Atlantic     | $\delta^{18}\text{O}$      | <i>G. bulloides</i>          | Annual   | 0.38 | [22] |
| MD01-2443-2444 | 37.69 | -10.15 | -2790  | North Atlantic     | $\text{U}^{\text{K}}_{37}$ | Na                           | Annual   | 0.41 | [22] |
| MD01-2447      | 42.15 | -9.66  | -2080  | North Atlantic     | $\delta^{18}\text{O}$      | <i>G. bulloides</i>          | Annual   | 1.47 | [23] |
| MD01-2447      | 42.15 | -9.66  | -2080  | North Atlantic     | MAT                        | Na                           | Seasonal | 2.70 | [24] |
| MD02-2529      | 8.21  | -84.12 | -1619  | Equatorial Pacific | $\delta^{18}\text{O}$      | <i>G. ruber</i>              | Annual   | 1.22 | [25] |
| MD02-2529      | 8.21  | -84.12 | -1619  | Equatorial Pacific | $\text{U}^{\text{K}}_{37}$ | Na                           | Annual   | 1.22 | [25] |
| MD02-2575      | 29.00 | -87.12 | -847   | Other              | $\delta^{18}\text{O}$      | <i>G. ruber</i>              | Annual   | 0.69 | [26] |
| MD02-2575      | 29.00 | -87.12 | -847   | Other              | Mg/Ca                      | <i>G. ruber</i>              | Annual   | 0.76 | [26] |
| MD02-2588      | 41.20 | 25.50  | -2907  | South Atlantic     | $\text{U}^{\text{K}}_{37}$ | Na                           | Annual   | 0.80 | [27] |
| MD04-2881      | 22.20 | 63.08  | -2387  | Indian             | $\delta^{18}\text{O}$      | <i>G. ruber</i>              | Annual   | 2.57 | [28] |
| MD05-2901      | 14.38 | 110.74 | -1454  | North Pacific      | $\delta^{18}\text{O}$      | <i>G. ruber</i>              | Annual   | 0.91 | [29] |
| MD05-2901      | 14.38 | 110.74 | -1454  | North Pacific      | $\text{U}^{\text{K}}_{37}$ | Na                           | Annual   | 0.96 | [29] |
| MD05-2904      | 19.46 | 116.25 | -2066  | North Pacific      | $\delta^{18}\text{O}$      | <i>G. ruber</i>              | Annual   | 0.37 | [30] |
| MD05-2904      | 19.46 | 116.25 | -2066  | North Pacific      | $\text{U}^{\text{K}}_{37}$ | Na                           | Annual   | 0.73 | [30] |
| MD05-2920      | -2.86 | 144.53 | -1849  | Equatorial Pacific | Mg/Ca                      | <i>G. ruber</i>              | Annual   | 1.65 | [31] |
| MD05-2925      | -9.34 | 151.46 | -1661  | Equatorial Pacific | $\delta^{18}\text{O}$      | <i>G. ruber</i>              | Annual   | 1.12 | [32] |
| MD05-2925      | -9.34 | 151.46 | -1661  | Equatorial Pacific | Mg/Ca                      | <i>G. ruber</i>              | Annual   | 1.12 | [32] |

|             |   |       |        |       |                    |                            |                      |          |      |      |
|-------------|---|-------|--------|-------|--------------------|----------------------------|----------------------|----------|------|------|
| MD06-2986   | - | 43.45 | 167.90 | -1477 | South Pacific      | Mg/Ca                      | <i>G. bulloides</i>  | Annual   | 1.29 | [33] |
| MD06-3074B  | - | 17.01 | 124.81 | -2510 | North Pacific      | $\delta^{18}\text{O}$      | <i>G. ruber</i>      | Annual   | 3.42 | [34] |
| MD06-3074B  | - | 17.01 | 124.81 | -2510 | North Pacific      | Mg/Ca                      | <i>G. ruber</i>      | Annual   | 3.17 | [34] |
| MD07-3077   | - | 44.15 | -14.22 | -3770 | South Atlantic     | $\delta^{18}\text{O}$      | <i>G. bulloides</i>  | Annual   | 0.77 | [35] |
| MD07-3077   | - | 44.15 | -14.22 | -3770 | South Atlantic     | $\delta^{18}\text{O}$      | <i>N. pachyderma</i> | Annual   | 0.77 | [35] |
| MD94-101    | - | 42.50 | 79.42  | -2920 | Indian             | MAT                        | <i>Na</i>            | Seasonal | 1.92 | [35] |
| MD95-2037   | - | 37.09 | -32.03 | -2159 | North Atlantic     | $\delta^{18}\text{O}$      | <i>G. bulloides</i>  | Annual   | 2.69 | [36] |
| MD95-2037   | - | 37.09 | -32.03 | -2159 | North Atlantic     | $\text{U}^{\text{K}}_{37}$ | <i>Na</i>            | Annual   | 3.23 | [37] |
| MD95-2040   | - | 40.58 | -9.86  | -2465 | North Atlantic     | $\delta^{18}\text{O}$      | <i>G. bulloides</i>  | Annual   | 0.43 | [38] |
| MD96-2077   | - | 33.28 | 31.42  | -3781 | Indian             | $\text{U}^{\text{K}}_{37}$ | <i>Na</i>            | Annual   | 2.88 | [39] |
| MD96-2080   | - | 36.27 | 19.48  | -2488 | South Atlantic     | $\delta^{18}\text{O}$      | <i>G. bulloides</i>  | Annual   | 0.57 | [40] |
| MD96-2080   | - | 36.27 | 19.48  | -2488 | South Atlantic     | Mg/Ca                      | <i>G. bulloides</i>  | Annual   | 2.22 | [40] |
| MD96-2085   | - | 29.70 | 12.94  | -3001 | South Atlantic     | $\delta^{18}\text{O}$      | <i>Bulk</i>          | Annual   | 1.42 | [41] |
| MD96-2094   | - | 20.00 | 9.27   | -2280 | South Atlantic     | $\delta^{18}\text{O}$      | <i>Bulk</i>          | Annual   | 1.59 | [42] |
| MD97-2120   | - | 45.53 | 174.93 | -1210 | South Pacific      | $\delta^{18}\text{O}$      | <i>G. bulloides</i>  | Annual   | 0.24 | [43] |
| MD97-2120   | - | 45.53 | 174.93 | -1210 | South Pacific      | Mg/Ca                      | <i>G. bulloides</i>  | Annual   | 0.44 | [43] |
| MD97-2140   | - | 2.03  | 141.77 | -2547 | Equatorial Pacific | $\delta^{18}\text{O}$      | <i>G. ruber</i>      | Annual   | 3.23 | [44] |
| MD97-2140   | - | 2.03  | 141.77 | -2547 | Equatorial Pacific | Mg/Ca                      | <i>G. ruber</i>      | Annual   | 3.14 | [44] |
| MD97-2141   | - | 8.78  | 121.28 | -3633 | Equatorial Pacific | $\delta^{18}\text{O}$      | <i>G. ruber</i>      | Annual   | 0.13 | [45] |
| MD98-2152   | - | -6.33 | 103.88 | -1796 | Indian             | $\text{U}^{\text{K}}_{37}$ | <i>Na</i>            | Annual   | 2.82 | [46] |
| ML1208-16BB | - | 0.48  | 161.45 | -2926 | Equatorial Pacific | $\delta^{18}\text{O}$      | <i>G. ruber</i>      | Annual   | 1.58 | [47] |
| ODP-1002    | - | 10.71 | -65.17 | -893  | Other              | $\delta^{18}\text{O}$      | <i>G. ruber</i>      | Annual   | 0.61 | [48] |
| ODP-1012    | - | 32.28 | 118.38 | -1783 | North Pacific      | $\text{U}^{\text{K}}_{37}$ | <i>Na</i>            | Annual   | 0.70 | [18] |

|                |       |        |         |                     |                              |                                |          |      |      |
|----------------|-------|--------|---------|---------------------|------------------------------|--------------------------------|----------|------|------|
| ODP-1020       | 41.00 | 126.43 | -3042   | North Pacific       | U <sup>K</sup> <sub>37</sub> | <i>Na</i>                      | Annual   | 2.36 | [18] |
| ODP-1059       | 31.68 | -75.42 | -2985   | North Atlantic      | δ <sup>18</sup> O            | <i>G. ruber</i>                | Annual   | 0.53 | [49] |
| ODP-1089       | 40.94 | 9.89   | -4620.5 | South Atlantic      | δ <sup>18</sup> O            | <i>G. bulloides</i>            | Annual   | 0.61 | [50] |
| ODP-1094       | 53.18 | 5.13   | -2807.3 | South Atlantic      | δ <sup>18</sup> O            | <i>N.</i><br><i>pachyderma</i> | Annual   | 0.56 | [51] |
| ODP-1094       | 53.18 | 5.13   | -2807.3 | South Atlantic      | Mg/Ca                        | <i>N.</i><br><i>pachyderma</i> | Annual   | 0.99 | [51] |
| ODP-1123       | 41.79 | 171.50 | -3290   | South Pacific       | MAT                          | <i>Na</i>                      | Annual   | 2.54 | [52] |
| ODP-1125       | 42.55 | 178.17 | -1365.1 | South Pacific       | U <sup>K</sup> <sub>37</sub> | <i>Na</i>                      | Annual   | 2.96 | [53] |
| ODP-1143       | 9.36  | 113.29 | -2772.3 | Equatorial Pacific  | U <sup>K</sup> <sub>37</sub> | <i>Na</i>                      | Annual   | 3.74 | [54] |
| ODP-1144       | 20.05 | 117.42 | -2037   | North Pacific       | δ <sup>18</sup> O            | <i>G. ruber</i>                | Annual   | 1.16 | [55] |
| ODP-1144       | 20.05 | 117.42 | -2037   | North Pacific       | Mg/Ca                        | <i>T. sacculifer</i>           | Annual   | 1.16 | [56] |
| ODP-1146       | 19.46 | 116.27 | -2091.5 | North Pacific       | δ <sup>18</sup> O            | <i>G. ruber</i>                | Annual   | 0.81 | [57] |
| ODP-1146       | 19.46 | 116.27 | -2091.5 | North Pacific       | U <sup>K</sup> <sub>37</sub> | <i>Na</i>                      | Annual   | 1.22 | [58] |
| ODP-1239       | -0.67 | -82.08 | -1414   | Equatorial Pacific  | U <sup>K</sup> <sub>37</sub> | <i>Na</i>                      | Annual   | 2.37 | [59] |
| ODP-1240       | 0.02  | -86.45 | -2920   | Equatorial Pacific  | δ <sup>18</sup> O            | <i>G. ruber</i>                | Annual   | 0.40 | [60] |
| ODP-1240       | 0.02  | -86.45 | -2920   | Equatorial Pacific  | Mg/Ca                        | <i>G. ruber</i>                | Annual   | 1.78 | [60] |
| ODP-607-V30-97 | 41.00 | -32.96 | -3427   | North Atlantic      | MAT                          | <i>Na</i>                      | Seasonal | 2.26 | [61] |
| ODP-662        | -1.39 | -11.74 | -3814   | Equatorial Atlantic | U <sup>K</sup> <sub>37</sub> | <i>Na</i>                      | Annual   | 1.88 | [58] |
| ODP-677        | 1.20  | -83.73 | -3450   | Equatorial Pacific  | δ <sup>18</sup> O            | <i>Bulk</i>                    | Annual   | 2.57 | [62] |
| ODP-722        | 16.62 | 59.80  | -2033.5 | Indian              | U <sup>K</sup> <sub>37</sub> | <i>Na</i>                      | Annual   | 1.72 | [58] |
| ODP-806        | 0.32  | 159.36 | -2519.9 | Equatorial Pacific  | δ <sup>18</sup> O            | <i>G. ruber</i>                | Annual   | 2.30 | [63] |
| ODP-806        | 0.32  | 159.36 | -2519.9 | Equatorial Pacific  | Mg/Ca                        | <i>G. ruber</i>                | Annual   | 3.40 | [63] |
| ODP-846        | -3.10 | -90.82 | -3296   | Equatorial Pacific  | U <sup>K</sup> <sub>37</sub> | <i>Na</i>                      | Annual   | 2.60 | [58] |
| ODP-871        | 5.55  | 172.35 | -1255   | Equatorial Pacific  | Mg/Ca                        | <i>G. ruber</i>                | Annual   | 2.81 | [64] |

|           |       |        |        |                    |                            |                      |          |      |      |
|-----------|-------|--------|--------|--------------------|----------------------------|----------------------|----------|------|------|
| ODP-980   | 55.48 | -14.70 | -2180  | North Atlantic     | $\delta^{18}\text{O}$      | <i>N. pachyderma</i> | Annual   | 3.74 | [65] |
| ODP-982   | 57.50 | -15.87 | -1135  | North Atlantic     | $\delta^{18}\text{O}$      | <i>G. bulloides</i>  | Annual   | 2.68 | [66] |
| ODP-982   | 57.50 | -15.87 | -1135  | North Atlantic     | $\text{U}^{\text{K}}_{37}$ | <i>Na</i>            | Seasonal | 3.80 | [66] |
| ODP-999   | 12.75 | -78.73 | -2827  | Other              | $\delta^{18}\text{O}$      | <i>G. ruber</i>      | Annual   | 1.42 | [67] |
| ODP-999   | 12.75 | -78.73 | -2827  | Other              | Mg/Ca                      | <i>G. ruber</i>      | Annual   | 1.43 | [67] |
| PRGL1     | 42.69 | 3.84   | -298.5 | Other              | $\delta^{18}\text{O}$      | <i>G. bulloides</i>  | Annual   | 0.92 | [68] |
| PRGL1     | 42.69 | 3.84   | -298.5 | Other              | $\text{U}^{\text{K}}_{37}$ | <i>Na</i>            | Annual   | 0.84 | [69] |
| PS2082    | -     |        |        |                    |                            |                      |          |      |      |
| PS2082    | 43.22 | 11.74  | -4610  | South Atlantic     | MAT                        | <i>Na</i>            | Seasonal | 3.86 | [70] |
| PS2489-2  | -     |        |        |                    |                            |                      |          |      |      |
| PS2489-2  | 42.87 | 8.97   | -3794  | South Atlantic     | MAT                        | <i>Na</i>            | Seasonal | 2.59 | [71] |
| RC11-120  | -     |        |        |                    |                            |                      |          |      |      |
| RC11-120  | 43.52 | 79.87  | -3193  | Indian             | $\delta^{18}\text{O}$      | <i>G. bulloides</i>  | Annual   | 1.68 | [72] |
| RC11-120  | -     |        |        |                    |                            |                      |          |      |      |
| RC11-120  | 43.52 | 79.87  | -3193  | Indian             | MAT                        | <i>Na</i>            | Seasonal | 1.68 | [72] |
| RC11-120  | -     |        |        |                    |                            |                      |          |      |      |
| RC11-120  | 43.52 | 79.87  | -3193  | Indian             | Mg/Ca                      | <i>G. bulloides</i>  | Annual   | 3.48 | [33] |
| RC12-294  | -     |        |        |                    |                            |                      |          |      |      |
| RC12-294  | 37.27 | -10.10 | -3308  | South Atlantic     | MAT                        | <i>Na</i>            | Seasonal | 2.00 | [16] |
| RC13-110  | -     |        |        |                    |                            |                      |          |      |      |
| RC13-110  | -0.10 | -95.65 | -3231  | Equatorial Pacific | $\delta^{18}\text{O}$      | <i>Bulk</i>          | Annual   | 2.37 | [73] |
| RC13-228  | -     |        |        |                    |                            |                      |          |      |      |
| RC13-228  | 22.33 | 11.20  | -3204  | South Atlantic     | MAT                        | <i>Na</i>            | Seasonal | 1.78 | [74] |
| RC27-61   | -     |        |        |                    |                            |                      |          |      |      |
| RC27-61   | 16.63 | 59.86  | -455   | Indian             | $\delta^{18}\text{O}$      | <i>T. sacculifer</i> | Annual   | 3.49 | [75] |
| SO136-111 | -     |        |        |                    |                            |                      |          |      |      |
| SO136-111 | 56.67 | 160.23 | -3912  | South Pacific      | $\delta^{18}\text{O}$      | <i>N. pachyderma</i> | Annual   | 1.56 | [76] |
| SO136-GC3 | -     |        |        |                    |                            |                      |          |      |      |
| SO136-GC3 | 42.30 | 169.80 | -1.955 | South Pacific      | $\delta^{18}\text{O}$      | <i>G. bulloides</i>  | Annual   | 2.08 | [77] |
| SO136-GC3 | -     |        |        |                    |                            |                      |          |      |      |
| SO136-GC3 | 42.30 | 169.80 | -1.955 | South Pacific      | $\text{U}^{\text{K}}_{37}$ | <i>Na</i>            | Annual   | 1.58 | [77] |
| SU90-39   | -     |        |        |                    |                            |                      |          |      |      |
| SU90-39   | 52.57 | -21.94 | -3955  | North Atlantic     | MAT                        | <i>Na</i>            | Seasonal | 0.57 | [74] |
| TN057-06  | -     |        |        |                    |                            |                      |          |      |      |
| TN057-06  | 42.90 | 8.90   | -3751  | South Atlantic     | $\delta^{18}\text{O}$      | <i>G. bulloides</i>  | Annual   | 1.64 | [78] |
| TR163-19  | -     |        |        |                    |                            |                      |          |      |      |
| TR163-19  | 2.26  | -90.95 | -2348  | Equatorial Pacific | $\delta^{18}\text{O}$      | <i>G. ruber</i>      | Annual   | 1.75 | [79] |
| TR163-19  | -     |        |        |                    |                            |                      |          |      |      |
| TR163-19  | 2.26  | -90.95 | -2348  | Equatorial Pacific | Mg/Ca                      | <i>G. ruber</i>      | Annual   | 1.20 | [79] |
| U1313     | -     |        |        |                    |                            |                      |          |      |      |
| U1313     | 41.00 | -32.96 | -3426  | North Atlantic     | $\text{U}^{\text{K}}_{37}$ | <i>Na</i>            | Annual   | 3.09 | [80] |

|        |       |        |       |                    |                            |                     |        |      |      |
|--------|-------|--------|-------|--------------------|----------------------------|---------------------|--------|------|------|
| U1385  | 37.57 | -10.13 | -2587 | North Atlantic     | $\delta^{18}\text{O}$      | <i>G. bulloides</i> | Annual | 0.18 | [81] |
| U1385  | 37.57 | -10.13 | -2587 | North Atlantic     | MAT                        | <i>Na</i>           | Annual | 0.20 | [82] |
| U1429  | 31.62 | 129.00 | -732  | North Pacific      | $\delta^{18}\text{O}$      | <i>G. ruber</i>     | Annual | 0.23 | [83] |
| U1429  | 31.62 | 129.00 | -732  | North Pacific      | Mg/Ca                      | <i>G. ruber</i>     | Annual | 0.23 | [83] |
| U1429  | 31.62 | 129.00 | -732  | North Pacific      | $\text{U}^{\text{K}}_{37}$ | <i>Na</i>           | Annual | 0.23 | [83] |
| U1446  | 19.08 | 85.74  | -1430 | Indian             | $\delta^{18}\text{O}$      | <i>G. ruber</i>     | Annual | 1.20 | [84] |
| U1446  | 19.08 | 85.74  | -1430 | Indian             | Mg/Ca                      | <i>G. ruber</i>     | Annual | 2.84 | [84] |
| V19-30 | -3.38 | -83.52 | -3091 | Equatorial Pacific | $\delta^{18}\text{O}$      | <i>Bulk</i>         | Annual | 0.91 | [73] |

141

142 [1] Elmore et al., 2015; [2] Scussolini et al., 2013; [3] Howard et al., 1992; [4] Le et al., 1992; [5] Wefer et al., 1996; [6] Schneider et al., 1995; [7] Wefer et al., 1999; [8]  
143 Nürnberg et al., 2000; [9] Sarnthein et al., 1994; [10] Ho et al., 2012; [11] Peeters et al., 2004; [12] Candy et al., 2018; [13] Nascimento et al., 2021; [14] Rouyer-Denimal et  
144 al., 2023; [15] Imbrie et al., 1992; [16] Imbrie et al., 1989; [17] Zhang et al., 2021; [18] Herbert et al., 2001; [19] Nürnberg, 2022; [20] Holbourn et al., 2005; [21] Gebhardt et  
145 al., 2008; [22] Martrat et al., 2007; [23] Desprat et al., 2006; [24] Viveen et al., 2013; [25] Rincón-Martínez et al., 2010; [26] Nürnberg et al., 2008; [27] Romero et al., 2015;  
146 [28] Ziegler et al., 2010; [29] Li et al., 2009; [30] He et al., 2008; [31] Tachikawa et al., 2014; [32] Lo et al., 2017; [33] Mashiotta et al., 1999; [34] Jia et al., 2018; [35] This  
147 study; [36] Bahr et al., 2015; [37] Calvo et al., 2001; [38] Voelker et al., 2011; [39] Bard et al., 2009; [40] Martínez-Méndez et al., 2010; [41] Chen et al., 2002; [42] Stuut et  
148 al., 2002; [43] Pahnke et al., 2003; [44] de Garidel-Thoron et al., 2005; [45] Oppo et al., 2003; [46] Windler et al., 2019; [47] Jacobel et al., 2025; [48] Gibson et al., 2014; [49]  
149 Billups et al., 2014; [50] Hodell et al., 2003; [51] Hasenfratz et al., 2019; [52] Hayward et al., 2008; [53] Peterson et al., 2020; [54] Li et al., 2011; [55] Bühring et al., 2004;  
150 [56] Wei et al., 2007; [57] Caballero-Gill et al., 2012; [58] Herbert et al., 2010; [59] Dyez et al., 2016; [60] Pena et al., 2008; [61] Ruddiman et al., 1989; [62] Shackleton et al.,  
151 1990; [63] Medina-Elizalde et al., 2005; [64] Dyez et al., 2014; [65] McManus et al., 1999; [66] Venz et al., 1999; [67] Schmidt et al., 2006; [68] Frigola et al., 2012; [69]  
152 Cortina et al., 2015; [70] Brathauer, 1996; [71] Becquey et al., 2003; [72] Martinson et al., 1987; [73] Lyle et al., 2002; [74] Vogelsang et al., 2000; [75] Clemens et al., 1990;  
153 [76] Crosta et al., 2004; [77] Pelejero et al., 2006; [78] Hodell et al., 2000; [79] Lea, 2004; [80] Naafs et al., 2012; [81] Hodell et al., 2022; [82] Singh et al., 2024; [83] Clemens  
154 et al., 2018; [84] Clemens et al., 2021.

155 **References**

- 156 Bahr, A., Kaboth, S., Jiménez-Espejo, F. J., Sierro, F. J., Voelker, A. H., Lourens, L., ... & Friedrich, O. (2015).  
157 Persistent monsoonal forcing of Mediterranean Outflow Water dynamics during the late Pleistocene. *Geology*,  
158 43(11), 951-954.
- 159 Bard, E., & Rickaby, R. E. (2009). Migration of the subtropical front as a modulator of glacial climate. *Nature*,  
160 460(7253), 380-383.
- 161 Becquey, S., & Gersonde, R. (2003). A 0.55-Ma paleotemperature record from the Subantarctic zone: Implications  
162 for Antarctic Circumpolar Current development. *Paleoceanography*, 18(1).
- 163 Billups, K., & Scheinwald, A. (2014). Origin of millennial-scale climate signals in the subtropical North Atlantic.  
164 *Paleoceanography*, 29(6), 612-627.
- 165 Bouchet, M., Landais, A., Grisart, A., Parrenin, F., Prié, F., Jacob, R., Fourré, E., Capron, E., Raynaud, D.,  
166 Lipenkov, V. Y., Loutre, M.-F., Extier, T., Svensson, A., Legrain, E., Martinerie, P., Leuenberger, M., Jiang, W.,  
167 Ritterbusch, F., Lu, Z.-T., and Yang, G.-M.: The Antarctic Ice Core Chronology 2023 (AICC2023) chronological  
168 framework and associated timescale for the European Project for Ice Coring in Antarctica (EPICA) Dome C ice  
169 core, *Clim. Past*, 19, 2257–2286, <https://doi.org/10.5194/cp-19-2257-2023>
- 170 Brathauer, U. (1996). Rekonstruktion quartärer Klimaänderungen im atlantischen Sektor des Südpolarmeeres  
171 anhand von Radiolarien = Radiolarians as indicators for Quaternary climatic changes in the Southern Ocean  
172 (Atlantic sector) (Doctoral dissertation, Universität Bremen).
- 173 Bühring, C., Sarnthein, M., & Erlenkeuser, H. (2004, December). Toward a high-resolution stable isotope  
174 stratigraphy of the last 1.1 my: Site 1144, South China Sea. In *Proc. ODP, Sci. Results* (Vol. 184, pp. 1-29).
- 175 Caballero-Gill, R. P., Clemens, S. C., & Prell, W. L. (2012). Direct correlation of Chinese speleothem  $\delta^{18}\text{O}$  and  
176 South China Sea planktonic  $\delta^{18}\text{O}$ : transferring a speleothem chronology to the benthic marine chronology.  
177 *Paleoceanography*, 27(2).
- 178 Calvo, E., Villanueva, J., Grimalt, J. O., Boelaert, A., & Labeyrie, L. (2001). New insights into the glacial  
179 latitudinal temperature gradients in the North Atlantic. Results from UK' 37 sea surface temperatures and  
180 terrigenous inputs. *Earth and Planetary Science Letters*, 188(3-4), 509-519.
- 181 Candy, I., & Alonso-Garcia, M. (2018). A 1 Ma sea surface temperature record from the North Atlantic and its  
182 implications for the early human occupation of Britain. *Quaternary Research*, 90(2), 406-417.
- 183 Chen, M. T., Chang, Y. P., Chang, C. C., Wang, L. W., Wang, C. H., & Yu, E. F. (2002). Late Quaternary sea-  
184 surface temperature variations in the southeast Atlantic: a planktic foraminifer faunal record of the past 600 000  
185 yr (IMAGES II MD962085). *Marine Geology*, 180(1-4), 163-181.
- 186 Clemens, S. C., & Prell, W. L. (1990). Late Pleistocene variability of Arabian Sea summer monsoon winds and  
187 continental aridity: Eolian records from the lithogenic component of deep-sea sediments. *Paleoceanography*, 5(2),  
188 109-145.

189 Clemens, S. C., Holbourn, A., Kubota, Y., Lee, K. E., Liu, Z., Chen, G., ... & Fox-Kemper, B. (2018). Precession-  
190 band variance missing from East Asian monsoon runoff. *Nature Communications*, 9(1), 3364.

191 Clemens, S. C., Yamamoto, M., Thirumalai, K., Giosan, L., Richey, J. N., Nilsson-Kerr, K., ... & McGrath, S. M.  
192 (2021). Remote and local drivers of Pleistocene South Asian summer monsoon precipitation: A test for future  
193 predictions. *Science Advances*, 7(23), eabg3848.

194 Cortina, A., Sierro, F. J., Flores, J. A., Martrat, B., & Grimalt, J. O. (2015). The response of SST to insolation and  
195 ice sheet variability from MIS 3 to MIS 11 in the northwestern Mediterranean Sea (Gulf of Lions). *Geophysical  
196 Research Letters*, 42(23), 10-366.

197 Crosta, X., Sturm, A., Armand, L., & Pichon, J. J. (2004). Late Quaternary sea ice history in the Indian sector of  
198 the Southern Ocean as recorded by diatom assemblages. *Marine Micropaleontology*, 50(3-4), 209-223.

199 de Garidel-Thoron, T., Rosenthal, Y., Bassinot, F., & Beaufort, L. (2005). Stable sea surface temperatures in the  
200 western Pacific warm pool over the past 1.75 million years. *Nature*, 433(7023), 294-298.

201 Desprat, S., Goñi, M. F. S., Turon, J. L., Duprat, J., Malaizé, B., & Peypouquet, J. P. (2006). Climatic variability  
202 of Marine Isotope Stage 7: direct land–sea–ice correlation from a multiproxy analysis of a north-western Iberian  
203 margin deep-sea core. *Quaternary Science Reviews*, 25(9-10), 1010-1026.

204 Dyez, K. A., & Ravelo, A. C. (2014). Dynamical changes in the tropical Pacific warm pool and zonal SST gradient  
205 during the Pleistocene. *Geophysical Research Letters*, 41(21), 7626-7633.

206 Dyez, K. A., Ravelo, A. C., & Mix, A. C. (2016). Evaluating drivers of Pleistocene eastern tropical Pacific sea  
207 surface temperature. *Paleoceanography*, 31(8), 1054-1069.

208 Elmore, A. C., Wright, J. D., & Chalk, T. B. (2015). Precession-driven changes in Iceland–Scotland Overflow  
209 Water penetration and bottom water circulation on Gardar Drift since ~200 ka. *Palaeogeography,  
210 Palaeoclimatology, Palaeoecology*, 440, 551-563.

211 Frigola, J., Canals, M., Cacho, I., Moreno, A., Sierro, F. J., Flores, J. A., ... & Schneider, R. (2012). A 500 kyr  
212 record of global sea-level oscillations in the Gulf of Lion, Mediterranean Sea: new insights into MIS 3 sea-level  
213 variability. *Climate of the Past*, 8(3), 1067-1077.

214 Gebhardt, H., Sarnthein, M., Grootes, P. M., Kiefer, T., Kuehn, H., Schmieder, F., & Röhl, U. (2008). Paleonutrient  
215 and productivity records from the subarctic North Pacific for Pleistocene glacial terminations I to V.  
216 *Paleoceanography*, 23(4).

217 Gibson, K. A., & Peterson, L. C. (2014). A 0.6 million year record of millennial-scale climate variability in the  
218 tropics. *Geophysical Research Letters*, 41(3), 969-975.

219 Hasenfratz, A. P., Jaccard, S. L., Martínez-García, A., Sigman, D. M., Hodell, D. A., Vance, D., ... & Haug, G. H.  
220 (2019). The residence time of Southern Ocean surface waters and the 100,000-year ice age cycle. *Science*,  
221 363(6431), 1080-1084.

- 222 Hayward, B. W., Scott, G. H., Crundwell, M. P., Kennett, J. P., Carter, L., Neil, H. L., ... & Li, Q. (2008). The  
223 effect of submerged plateaux on Pleistocene gyral circulation and sea-surface temperatures in the Southwest  
224 Pacific. *Global and Planetary Change*, 63(4), 309-316.
- 225 He, J., Zhao, M., Li, L., Wang, P., & Ge, H. (2008). Sea surface temperature and terrestrial biomarker records of  
226 the last 260 ka of core MD05-2904 from the northern South China Sea. *Chinese Science Bulletin*, 53(15), 2376-  
227 2384.
- 228 Herbert, T. D., Schuffert, J. D., Andreasen, D., Heusser, L., Lyle, M., Mix, A., ... & Herguera, J. C. (2001). Collapse  
229 of the California Current during glacial maxima linked to climate change on land. *Science*, 293(5527), 71-76.
- 230 Herbert, T. D., Peterson, L. C., Lawrence, K. T., & Liu, Z. (2010). Tropical ocean temperatures over the past 3.5  
231 million years. *Science*, 328(5985), 1530-1534.
- 232 Hodell, D. A., Charles, C. D., & Ninnemann, U. S. (2000). Comparison of interglacial stages in the South Atlantic  
233 sector of the Southern Ocean for the past 450 kyr: implications for Marine Isotope Stage (MIS) 11. *Global and*  
234 *Planetary Change*, 24(1), 7-26.
- 235 Hodell, D. A., Charles, C. D., Curtis, J. H., Mortyn, P. G., Ninnemann, U. S., & Venz, K. A. (2003, January). Data  
236 report: Oxygen isotope stratigraphy of ODP Leg 177 Sites 1088, 1089, 1090, 1093, and 1094. In *Proc. Ocean Drill.*  
237 *Program Sci. Results* (Vol. 177, pp. 1-26).
- 238 Hodell, D., Crowhurst, S., Lourens, L., Margari, V., Nicolson, J., Rolfe, J. E., ... & Wolff, E. W. (2022). A 1.5-  
239 million-year record of orbital and millennial climate variability in the North Atlantic. *Climate of the Past*  
240 *Discussions*, 2022, 1-58.
- 241 Ho, S. L., Mollenhauer, G., Lamy, F., Martínez-García, A., Mohtadi, M., Gersonde, R., ... & Tiedemann, R. (2012).  
242 Sea surface temperature variability in the Pacific sector of the Southern Ocean over the past 700 kyr.  
243 *Paleoceanography*, 27(4).
- 244 Holbourn, A., Kuhnt, W., Kawamura, H., Jian, Z., Grootes, P., Erlenkeuser, H., & Xu, J. (2005). Orbitally paced  
245 paleoproductivity variations in the Timor Sea and Indonesian Throughflow variability during the last 460 kyr.  
246 *Paleoceanography*, 20(3).
- 247 Howard, W. R., & Prell, W. L. (1992). Late Quaternary surface circulation of the southern Indian Ocean and its  
248 relationship to orbital variations. *Paleoceanography*, 7(1), 79-117.
- 249 Imbrie, J., Boyle, E. A., Clemens, S. C., Duffy, A., Howard, W. R., Kukla, G., ... & Toggweiler, J. R. (1992). On  
250 the structure and origin of major glaciation cycles 1. Linear responses to Milankovitch forcing. *Paleoceanography*,  
251 7(6), 701-738.
- 252 Imbrie, J., McIntyre, A., & Mix, A. (1989). Oceanic response to orbital forcing in the late Quaternary:  
253 Observational and experimental strategies. In *Climate and Geo-sciences: a Challenge for Science and Society in*  
254 *the 21st Century* (pp. 121-164). Dordrecht: Springer Netherlands.
- 255 Jacobel, A. W., Costa, K. M., Applebaum, L. M., & Conde, S. (2025). New controls on sedimentation and climate  
256 in the central equatorial Pacific Ocean. *Geochronology*, 7(1), 123-138.

257 Jia, Q., Li, T., Xiong, Z., Steinke, S., Jiang, F., Chang, F., & Qin, B. (2018). Hydrological variability in the western  
258 tropical Pacific over the past 700 kyr and its linkage to Northern Hemisphere climatic change. *Palaeogeography,*  
259 *Palaeoclimatology, Palaeoecology*, 493, 44-54.

260 Jouzel, J., Masson-Delmotte, V., Cattani, O., Dreyfus, G., Falourd, S., Hoffmann, G., Minster, B., Nouet, J.,  
261 Barnola, J. M., Chappellaz, J., Fischer, H., Gallet, J. C., Johnsen, S., Leuenberger, M., Loulergue, L., Luethi, D.,  
262 Oerter, H., Parrenin, F., Raisbeck, G., Raynaud, D., Schilt, A., Schwander, J., Selmo, E., Souchez, R., Spahni, R.,  
263 Stauffer, B., Steffensen, J. P., Stenni, B., Stocker, T. F., Tison, J. L., Werner, M., and Wolff, E. W. (2007): Orbital  
264 and Millennial Antarctic Climate Variability over the Past 800,000 Years, *Science*, 317, 793–796,  
265 <https://doi.org/10.1126/science.1141038>

266 Le, J., & Shackleton, N. J. (1992). Carbonate dissolution fluctuations in the western equatorial Pacific during the  
267 late Quaternary. *Paleoceanography*, 7(1), 21-42.

268 Lea, D. W. (2004). The 100 000-yr cycle in tropical SST, greenhouse forcing, and climate sensitivity. *Journal of*  
269 *Climate*, 17(11), 2170-2179.

270 Li, L., Wang, H, Li, J., Zhao, M., & Wang, P. (2009). Changes in sea surface temperature in western South China  
271 Sea over the past 450 ka. *Chinese Science Bulletin*, 54(18), 3335-3343.

272 Li, L., Li, Q., Tian, J., Wang, P., Wang, H., & Liu, Z. (2011). A 4-Ma record of thermal evolution in the tropical  
273 western Pacific and its implications on climate change. *Earth and Planetary Science Letters*, 309(1-2), 10-20.

274 Lo, L., Chang, S. P., Wei, K. Y., Lee, S. Y., Ou, T. H., Chen, Y. C., ... & Shen, C. C. (2017). Nonlinear climatic  
275 sensitivity to greenhouse gases over past 4 glacial/interglacial cycles. *Scientific Reports*, 7(1), 4626.

276 Lyle, M., Mix, A., & Pisias, N. (2002). Patterns of CaCO<sub>3</sub> deposition in the eastern tropical Pacific Ocean for the  
277 last 150 kyr: Evidence for a southeast Pacific depositional spike during marine isotope stage (MIS) 2.  
278 *Paleoceanography*, 17(2), 3-1.

279 Martrat, B., Grimalt, J. O., Shackleton, N. J., de Abreu, L., Hutterli, M. A., & Stocker, T. F. (2007). Four climate  
280 cycles of recurring deep and surface water destabilizations on the Iberian margin. *Science*, 317(5837), 502-507.

281 Martinson, D. G., Pisias, N. G., Hays, J. D., Imbrie, J., Moore Jr, T. C., & Shackleton, N. J. (1987). Age dating  
282 and the orbital theory of the ice ages: development of a high-resolution 0 to 300,000-year chronostratigraphy.  
283 *Quaternary Research*, 27(1), 1-29.

284 Martínez-Méndez, G., Zahn, R., Hall, I. R., Peeters, F. J., Pena, L. D., Cacho, I., & Negre, C. (2010). Contrasting  
285 multiproxy reconstructions of surface ocean hydrography in the Agulhas Corridor and implications for the Agulhas  
286 Leakage during the last 345,000 years. *Paleoceanography*, 25(4).

287 Mashiotta, T. A., Lea, D. W., & Spero, H. J. (1999). Glacial–interglacial changes in Subantarctic sea surface  
288 temperature and  $\delta^{18}\text{O}$ -water using foraminiferal Mg. *Earth and Planetary Science Letters*, 170(4), 417-432.

289 McManus, J. F., Oppo, D. W., & Cullen, J. L. (1999). A 0.5-million-year record of millennial-scale climate  
290 variability in the North Atlantic. *Science*, 283(5404), 971-975.

- 291 Medina-Elizalde, M., & Lea, D. W. (2005). The mid-Pleistocene transition in the tropical Pacific. *Science*,  
292 310(5750), 1009-1012.
- 293 Naafs, B. D. A., Hefter, J., Acton, G., Haug, G. H., Martínez-García, A., Pancost, R., & Stein, R. (2012).  
294 Strengthening of North American dust sources during the late Pliocene (2.7 Ma). *Earth and Planetary Science*  
295 *Letters*, 317, 8-19.
- 296 Nascimento, R. A., Venancio, I. M., Chiessi, C. M., Ballalai, J. M., Kuhnert, H., Johnstone, H., ... & Albuquerque,  
297 A. L. S. (2021). Tropical Atlantic stratification response to late Quaternary precessional forcing. *Earth and*  
298 *Planetary Science Letters*, 568, 117030.
- 299 Nürnberg, D., Müller, A., & Schneider, R. R. (2000). Paleo-sea surface temperature calculations in the equatorial  
300 east Atlantic from Mg/Ca ratios in planktic foraminifera: A comparison to sea surface temperature estimates from  
301 U37K', oxygen isotopes, and foraminiferal transfer function. *Paleoceanography*, 15(1), 124-134.
- 302 Nürnberg, D., Ziegler, M., Karas, C., Tiedemann, R., & Schmidt, M. W. (2008). Interacting Loop Current  
303 variability and Mississippi River discharge over the past 400 kyr. *Earth and Planetary Science Letters*, 272(1-2),  
304 278-289.
- 305 Nürnberg, Dirk (2022): Benthic and planktonic stable isotopes and coarse fraction of sediment core M94-480 PC  
306 [dataset]. PANGAEA, <https://doi.org/10.1594/PANGAEA.947790>
- 307 Oppo, D. W., Linsley, B. K., Rosenthal, Y., Dannenmann, S., & Beaufort, L. (2003). Orbital and suborbital climate  
308 variability in the Sulu Sea, western tropical Pacific. *Geochemistry, Geophysics, Geosystems*, 4(1), 1-20.
- 309 Paillard, D., Labeyrie, L., and Yiou, P. (1996): Macintosh program performs time-series analysis, *Eos*  
310 *Transactions*, 77, 379–379, <https://doi.org/10.1029/96EO00259>
- 311 Pahnke, K., Zahn, R., Elderfield, H., & Schulz, M. (2003). 340,000-year centennial-scale marine record of  
312 Southern Hemisphere climatic oscillation. *Science*, 301(5635), 948-952.
- 313 Peeters, F. J., Acheson, R., Brummer, G. J. A., De Ruijter, W. P., Schneider, R. R., Ganssen, G. M., ... & Kroon,  
314 D. (2004). Vigorous exchange between the Indian and Atlantic oceans at the end of the past five glacial periods.  
315 *Nature*, 430(7000), 661-665.
- 316 Pelejero, C., Calvo, E., Barrows, T. T., Logan, G. A., & De Deckker, P. (2006). South Tasman Sea alkenone  
317 palaeothermometry over the last four glacial/interglacial cycles. *Marine Geology*, 230(1-2), 73-86.
- 318 Pena, L. D., Cacho, I., Ferretti, P., & Hall, M. A. (2008). El Niño–Southern Oscillation–like variability during  
319 glacial terminations and interlatitudinal teleconnections. *Paleoceanography*, 23(3).
- 320 Peterson, L. C., Lawrence, K. T., Herbert, T. D., Caballero-Gill, R., Wilson, J., Huska, K., ... & Holte, L. (2020).  
321 Plio-Pleistocene hemispheric (a)symmetries in the Northern and Southern Hemisphere midlatitudes.  
322 *Paleoceanography and Paleoclimatology*, 35(3), e2019PA003720.

323 Rincón-Martínez, D., Lamy, F., Contreras, S., Leduc, G., Bard, E., Saukel, C., ... & Tiedemann, R. (2010). More  
324 humid interglacials in Ecuador during the past 500 kyr linked to latitudinal shifts of the equatorial front and the  
325 Intertropical Convergence Zone in the eastern tropical Pacific. *Paleoceanography*, 25(2).

326 Romero, O. E., Kim, J. H., Bárcena, M. A., Hall, I. R., Zahn, R., & Schneider, R. (2015). High-latitude forcing of  
327 diatom productivity in the southern Agulhas Plateau during the past 350 kyr. *Paleoceanography*, 30(2), 118-132.

328 Rouyer-Denimal, L., Govin, A., Bouloubassi, I., Tu, T. T. N., Albuquerque, A. L. S., Anquetil, C., & Hugué, A.  
329 (2023). Subsurface warming in the tropical Atlantic for the last 3 deglaciations: Insights from organic molecular  
330 proxies. *Quaternary Science Reviews*, 321, 108370.

331 Ruddiman, W. F., Raymo, M., Martinson, D. G., Clement, B. M., & Backman, J. (1989). Pleistocene evolution:  
332 Northern Hemisphere ice sheets and North Atlantic Ocean. *Paleoceanography*, 4(4), 353-412.

333 Sarnthein, M., Winn, K., Jung, S. J., Duplessy, J. C., Labeyrie, L., Erlenkeuser, H., & Ganssen, G. (1994). Changes  
334 in east Atlantic deepwater circulation over the last 30,000 years: Eight time slice reconstructions.  
335 *Paleoceanography*, 9(2), 209-267.

336 Schmidt, M. W., Vautravers, M. J., & Spero, H. J. (2006). Western Caribbean sea surface temperatures during the  
337 late Quaternary. *Geochemistry, Geophysics, Geosystems*, 7(2).

338 Schneider, R. R., Müller, P. J., & Ruhland, G. (1995). Late Quaternary surface circulation in the east equatorial  
339 South Atlantic: Evidence from alkenone sea surface temperatures. *Paleoceanography*, 10(2), 197-219.

340 Scussolini, P., & Peeters, F. J. (2013). A record of the last 460 thousand years of upper ocean stratification from  
341 the central Walvis Ridge, South Atlantic. *Paleoceanography*, 28(3), 426-439.

342 Shackleton, N. J., Berger, A., & Peltier, W. R. (1990). An alternative astronomical calibration of the lower  
343 Pleistocene timescale based on ODP Site 677. *Earth and Environmental Science Transactions of the Royal Society  
344 of Edinburgh*, 81(4), 251-261.

345 Singh, H., & Singh, A. D. (2024). New insights into the surface-ocean dynamics of the Northeastern Atlantic  
346 Ocean across the Marine Isotope Stage 7. *Paleoceanography and Paleoclimatology*, 39(5), e2023PA004722.

347 Stuut, J. B. W., Prins, M. A., Schneider, R. R., Weltje, G. J., Jansen, J. F., & Postma, G. (2002). A 300-kyr record  
348 of aridity and wind strength in southwestern Africa: inferences from grain-size distributions of sediments on  
349 Walvis Ridge, SE Atlantic. *Marine Geology*, 180(1-4), 221-233.

350 Tachikawa, K., Timmermann, A., Vidal, L., Sonzogni, C., & Timm, O. E. (2014). CO<sub>2</sub> radiative forcing and  
351 Intertropical Convergence Zone influences on western Pacific warm pool climate over the past 400 ka. *Quaternary  
352 Science Reviews*, 86, 24-34.

353 Venz, K. A., Hodell, D. A., Stanton, C., & Warnke, D. A. (1999). A 1.0 Myr record of Glacial North Atlantic  
354 Intermediate Water variability from ODP site 982 in the northeast Atlantic. *Paleoceanography*, 14(1), 42-52.

355

- 356 Viveen, W., Schoorl, J. M., Veldkamp, A., Van Balen, R. T., Desprat, S., & Vidal-Romani, J. R. (2013).  
357 Reconstructing the interacting effects of base level, climate, and tectonic uplift in the lower Miño River terrace  
358 record: a gradient modelling evaluation. *Geomorphology*, 186, 96-118.
- 359 Voelker, A. H., & de Abreu, L. (2011). A review of abrupt climate change events in the Northeastern Atlantic  
360 Ocean (Iberian Margin): Latitudinal, longitudinal, and vertical gradients. *Abrupt Climate Change: Mechanisms,*  
361 *Patterns, and Impacts*, 193, 15-37.
- 362 Vogelsang, E., Sarnthein, M., & Pflaumann, U. (2000).  $\delta^{18}\text{O}$ -Stratigraphy, Chronology and Sea Surface  
363 Temperatures of Atlantic Sediment Records. *Berichte: Reports*.
- 364 Wei, G., Deng, W., Liu, Y., & Li, X. (2007). High-resolution sea surface temperature records derived from  
365 foraminiferal Mg/Ca ratios during the last 260 ka in the northern South China Sea. *Palaeogeography,*  
366 *Palaeoclimatology, Palaeoecology*, 250(1-4), 126-138.
- 367 Wefer, G. A., Berger, W. H., Bickert, T., Donner, B., Fischer, G., von Mücke, S. K., ... & Segl, M. (1996). Late  
368 Quaternary surface circulation of the South Atlantic: The stable isotope record and implications for heat transport  
369 and productivity. In *The South Atlantic: Present and Past Circulation* (pp. 461-502). Berlin, Heidelberg: Springer  
370 Berlin Heidelberg.
- 371 Wefer, G., Berger, W. H., Bijma, J., & Fischer, G. (1999). Clues to ocean history: a brief overview of proxies. *Use*  
372 *of Proxies in Paleoceanography: Examples from the South Atlantic*, 1-68.
- 373 Windler, G., Tierney, J. E., DiNezio, P. N., Gibson, K., & Thunell, R. (2019). Shelf exposure influence on Indo-  
374 Pacific Warm Pool climate for the last 450,000 years. *Earth and Planetary Science Letters*, 516, 66-76.
- 375 Zhang, S., Yu, Z., Gong, X., Wang, Y., Chang, F., Lohmman, G., ... & Li, T. (2021). Precession cycles of the El  
376 Niño/Southern oscillation-like system controlled by Pacific upper-ocean stratification. *Communications Earth &*  
377 *Environment*, 2(1), 239.
- 378 Ziegler, M., Lourens, L. J., Tuenter, E., & Reichert, G. J. (2010). High Arabian Sea productivity conditions during  
379 MIS 13—odd monsoon event or intensified overturning circulation at the end of the Mid-Pleistocene transition?.  
380 *Climate of the Past*, 6(1), 63-76.
